# Supplementary material for: Programmable Physical Properties of Freestanding Chitosan Membranes Electrofabricated in Microfluidics
Source: MDPI journal article supplement (doi:10.3390/membranes13030294), 2023-02-28
Supplement: s1 [file s1]

Supplementary Materials

# Programmable Physical Properties of Freestanding Chitosan Membranes Electrofabricated in Microfluidics

Khanh L. Ly <sup>1</sup>, Piao Hu <sup>2</sup>, Christopher B. Raub <sup>1</sup> and Xiaolong Luo <sup>2,\*</sup>

<sup>1</sup> Department of Biomedical Engineering, School of Engineering, Catholic University of America, Washington, DC 20064, USA

<sup>2</sup> Department of Mechanical Engineering, School of Engineering, Catholic University of America, Washington, DC 20064, USA

\* Correspondence: luox@cua.edu

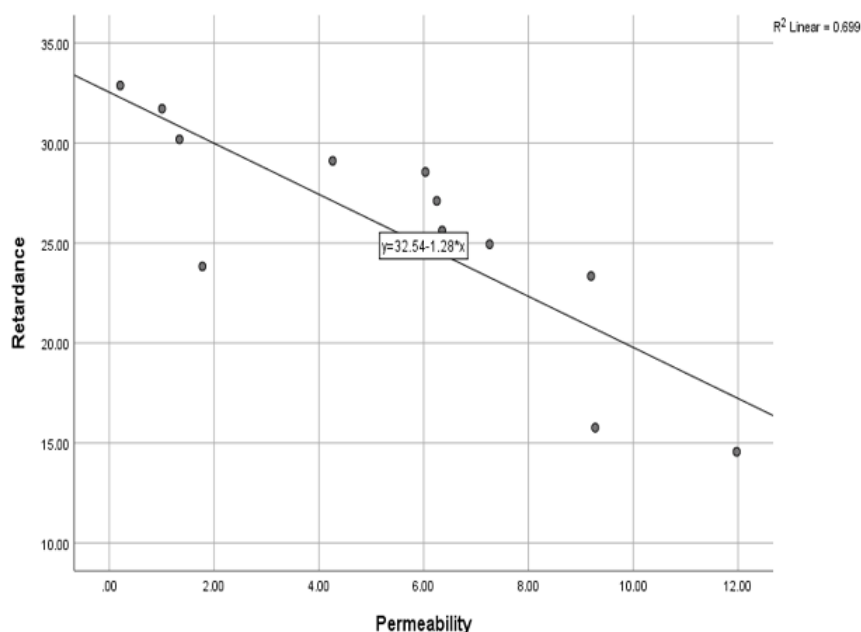

## Correlations

|              |                     | Permeability | Retardance |
|--------------|---------------------|--------------|------------|
| Permeability | Pearson Correlation | 1            | -.836**    |
|              | Sig. (2-tailed)     |              | .001       |
|              | N                   | 12           | 12         |
| Retardance   | Pearson Correlation | -.836**      | 1          |
|              | Sig. (2-tailed)     | .001         |            |
|              | N                   | 12           | 12         |

\*\* . Correlation is significant at the 0.01 level (2-tailed).

**Figure S1.** Correlation plot and test between the semi-permeability and optical retardance of electrofabricated chitosan membranes.
